# Supplementary material for: Formation of an aminoacyl-S-enzyme intermediate is a key step in the biosynthesis of chloramphenicol
Source: Royal Society of Chemistry journal article supplement (doi:10.1039/b703356g), 2007-01-01
Supplement: b703356g.pdf [file b703356g.pdf]

## Supplemental Data

### **Formation of an Aminoacyl-S-Enzyme Intermediate is a Key Step in the Biosynthesis of Chloramphenicol**

**Michelle Pacholec, Jason K. Sello, Christopher T. Walsh, and Michael G. Thomas**

**Cloning of *cmlP*** The gene encoding CmlP was PCR amplified from *S. venezuelae* genomic DNA using the following primers: *CmlP4/NdeI* (5'- CAA CAT ATG GAA CTC CCT GAC GTG TTG- 3') and *CmlP/HindIII* (5'- CAT GGT AAG CTT CGG CTC CGT TCC TGT CAG CGC- 3'). The amplicon was subsequently digested with *NdeI* and *HindIII* and cloned into the corresponding sites of pET16b (Novagen). The cloned gene was sequenced to ensure no PCR-induced mutations occurred.

**Heterologous Overproduction of *CmlP*** The expression construct was transformed into *E. coli* BL21(DE3) to produce the *apo*-protein with an *N*-terminal, deca-histidine affinity tag. To produce the corresponding *holo*-protein, *E. coli* BL21 (DE3) was co-transformed with pH10-CmlP and pSU20-Sfp, which harbors the gene encoding Sfp, the phosphopantetheinyl transferase from *B. subtilis*. Cells were grown in LB media with ampicillin (and chloramphenicol for pSU20-Sfp selection) at 20°C for 36 h. Cells were harvested by centrifugation.

**Purification of *CmlP*** The harvested cells were resuspended in 25 mM Tris-HCl (pH 8.0), 400 mM NaCl, 2 mM imidazole, 10 mM MgCl<sub>2</sub>, and 1 mM tris-(2-carboxyethyl)phosphine hydrochloride. The resuspended cells were broken using a French Press and the cell debris was removed by centrifugation. The supernatant was incubated with 1 ml of Ni<sup>2+</sup>-NTA Superflow Resin (Qiagen) for 4 hr at 4°C. After recovery and washing of the resin, the protein was eluted in this buffer with a step gradient of increasing imidazole concentration (5, 20, 40, 60 and 200 mM). CmlP eluted at 20 mM imidazole as determined by SDS-PAGE with Coomassie staining. The eluted protein was then dialyzed against 50 mM Tris-HCl, pH 8.0, 50 mM NaCl, 10% glycerol. The protein was then subjected to ion exchange chromatography using a 5 ml Q-Sepharose Hi-Trap column (Amersham Biosciences). The protein was eluted in this buffer using a linear gradient of increasing NaCl concentration from 50 mM to 500 mM. An coomassie-stained SDS-PAGE gel showing purified CmlP is shown in Supplemental Data Figure 1. The protein concentration was determined from its calculated molar extinction coefficient.

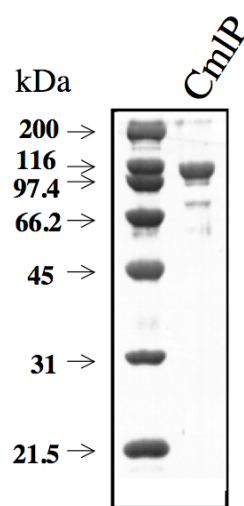

**Supplemental Data Figure 1.** 12% acrylamide SDS-PAGE gel of purified CmlP

**Autoaminoacylation of *holo-CmlP*.** To assay autoaminoacylation, *holo-CmlP* was incubated with [<sup>3</sup>H]-L-*p*-aminophenylalanine and with or without ATP. The enzyme's incorporation of the radiolabel was measured by liquid scintillation counting and by autoradiography. An autoradiogram of such a reaction is shown in Supplemental Data Figure 2.

**Detection of *p*-APA-S-CmlP Intermediate**

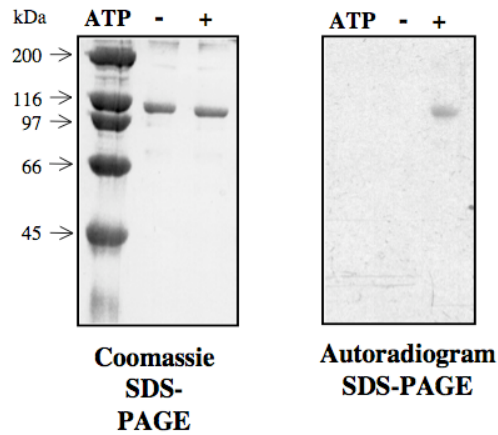

**Supplemental Data Figure 2.** (Left) Coomassie-stained SDS-PAGE gel of purified *holo-CmlP* incubated with [<sup>3</sup>H]-L-*p*-aminophenylalanine with and without ATP. (Right) Autoradiogram of the same gel.
